# Supplementary material for: Antisense oligonucleotides selectively enter human-derived antibiotic-resistant bacteria through ATP-binding cassette transporter
Source: Research Square preprint supplement (doi:10.21203/rs.3.rs-1336720/v1), 2022-02-10
Supplement: Supplementary file 1 [file 404b9849cb3c8338a6e901b2.docx]

**Supplementary Information**

**Antisense oligonucleotides selectively enter human-derived antibiotic-resistant bacteria through ATP-binding cassette transporter**

Mingzhu Liu,1, ‡ Rong Sun,1, ‡ Jiali Ding,1 Han Ye,2 Binbin Chu,1 Yunmin Yang,1 Yuqi Wu,1 Haoliang Shi,1 Bin Song,1 Jiaxu Hong,2, * Houyu Wang1, * & Yao He1, *

1Suzhou Key Laboratory of Nanotechnology and Biomedicine, Institute of Functional Nano & Soft Materials & Collaborative Innovation Center of Suzhou Nano Science and Technology (NANO-CIC), Soochow University, Suzhou 215123, China

2Department of Ophthalmology and Vision Science, Shanghai Eye, Ear, Nose and Throat Hospital, Fudan University, Shanghai, China.

* Corresponding authors. Email: jiaxu.hong@fdeent.org; houyuwang@suda.edu.cn; yaohe@suda.edu.cn

‡ These authors contributed equally to this work.

**Supplementary Table 1 Sequences of asPNA and (KFF)3K-asPNA**

| **Nucleic acid** | **Sequence** |  |
| --- | --- | --- |
| **asPNA** | **Cy7.5-CTCATACTCTCCATGATTTA-Glu** |  |
| **(KFF)3K-asPNA** | **Cy7.5-CTCATACTCTCCATGATTTA-Glu-KFFKFFKFFK** |  |

**Supplementary Table 2 Primer sequences of relevant genes designed for RT-PCR**

| **mRNA** | **primer pairs** |
| --- | --- |
| **16sRNA** | **forward 5’-TCGTGTCGTGAGATGTTGGG-3’** |
|  | **reverse 5’-GTTTGTCACCGGCAGTCAAC-3’** |
| **acpP** | **forward 5’-GCGGATTCTCTTGACACCGT-3’** |
|  | **reverse 5’-CAGCCTGAACGGTGGTGATT-3’** |
| **fmhB** | **forward 5’-TGCTTCAAAAGTGCGCTTGG-3’**  **reverse 5’-CACGCGTTAAGAAGCCATCG-3’** |

**
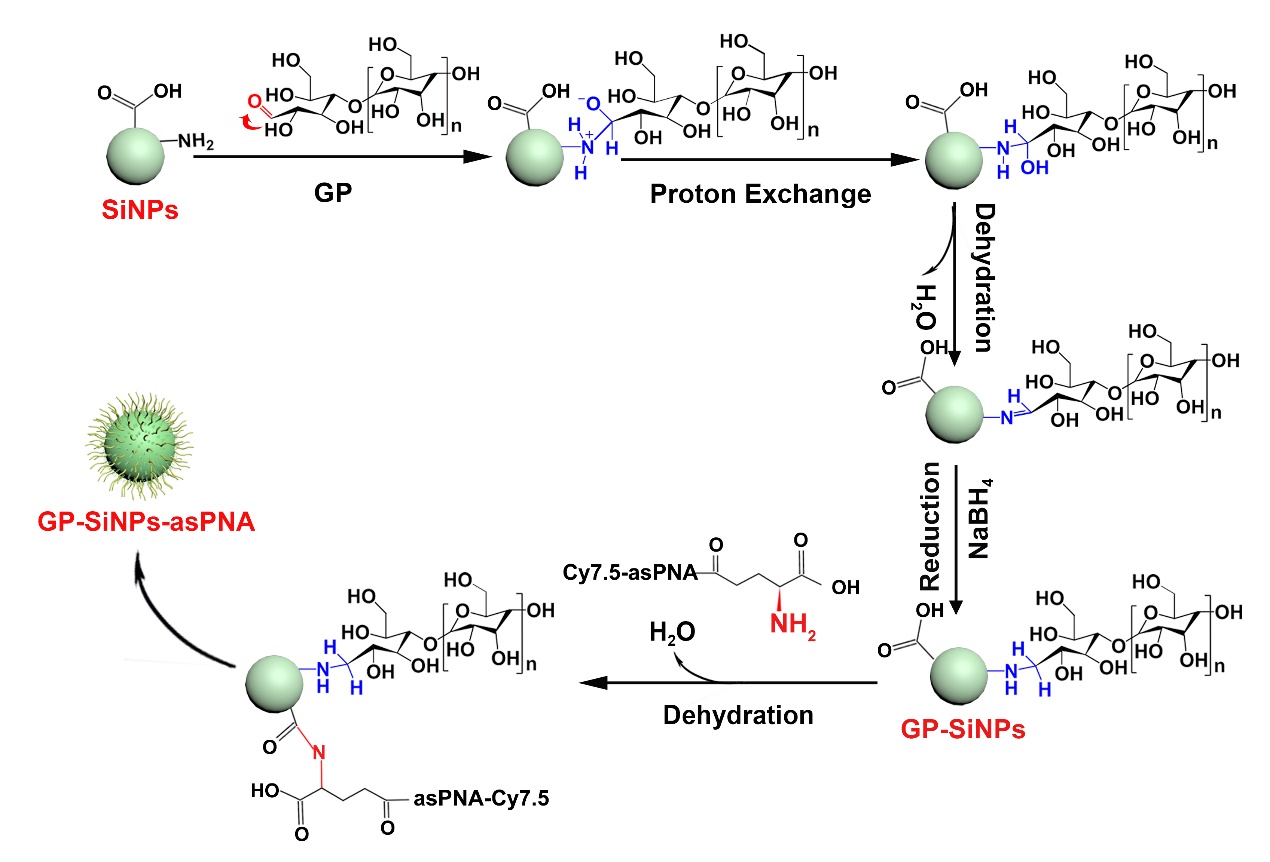
**

**Supplementary Fig. 1 Scheme illustrating the step-by-step synthesis of GP-SiNPs-asPNA.**

**
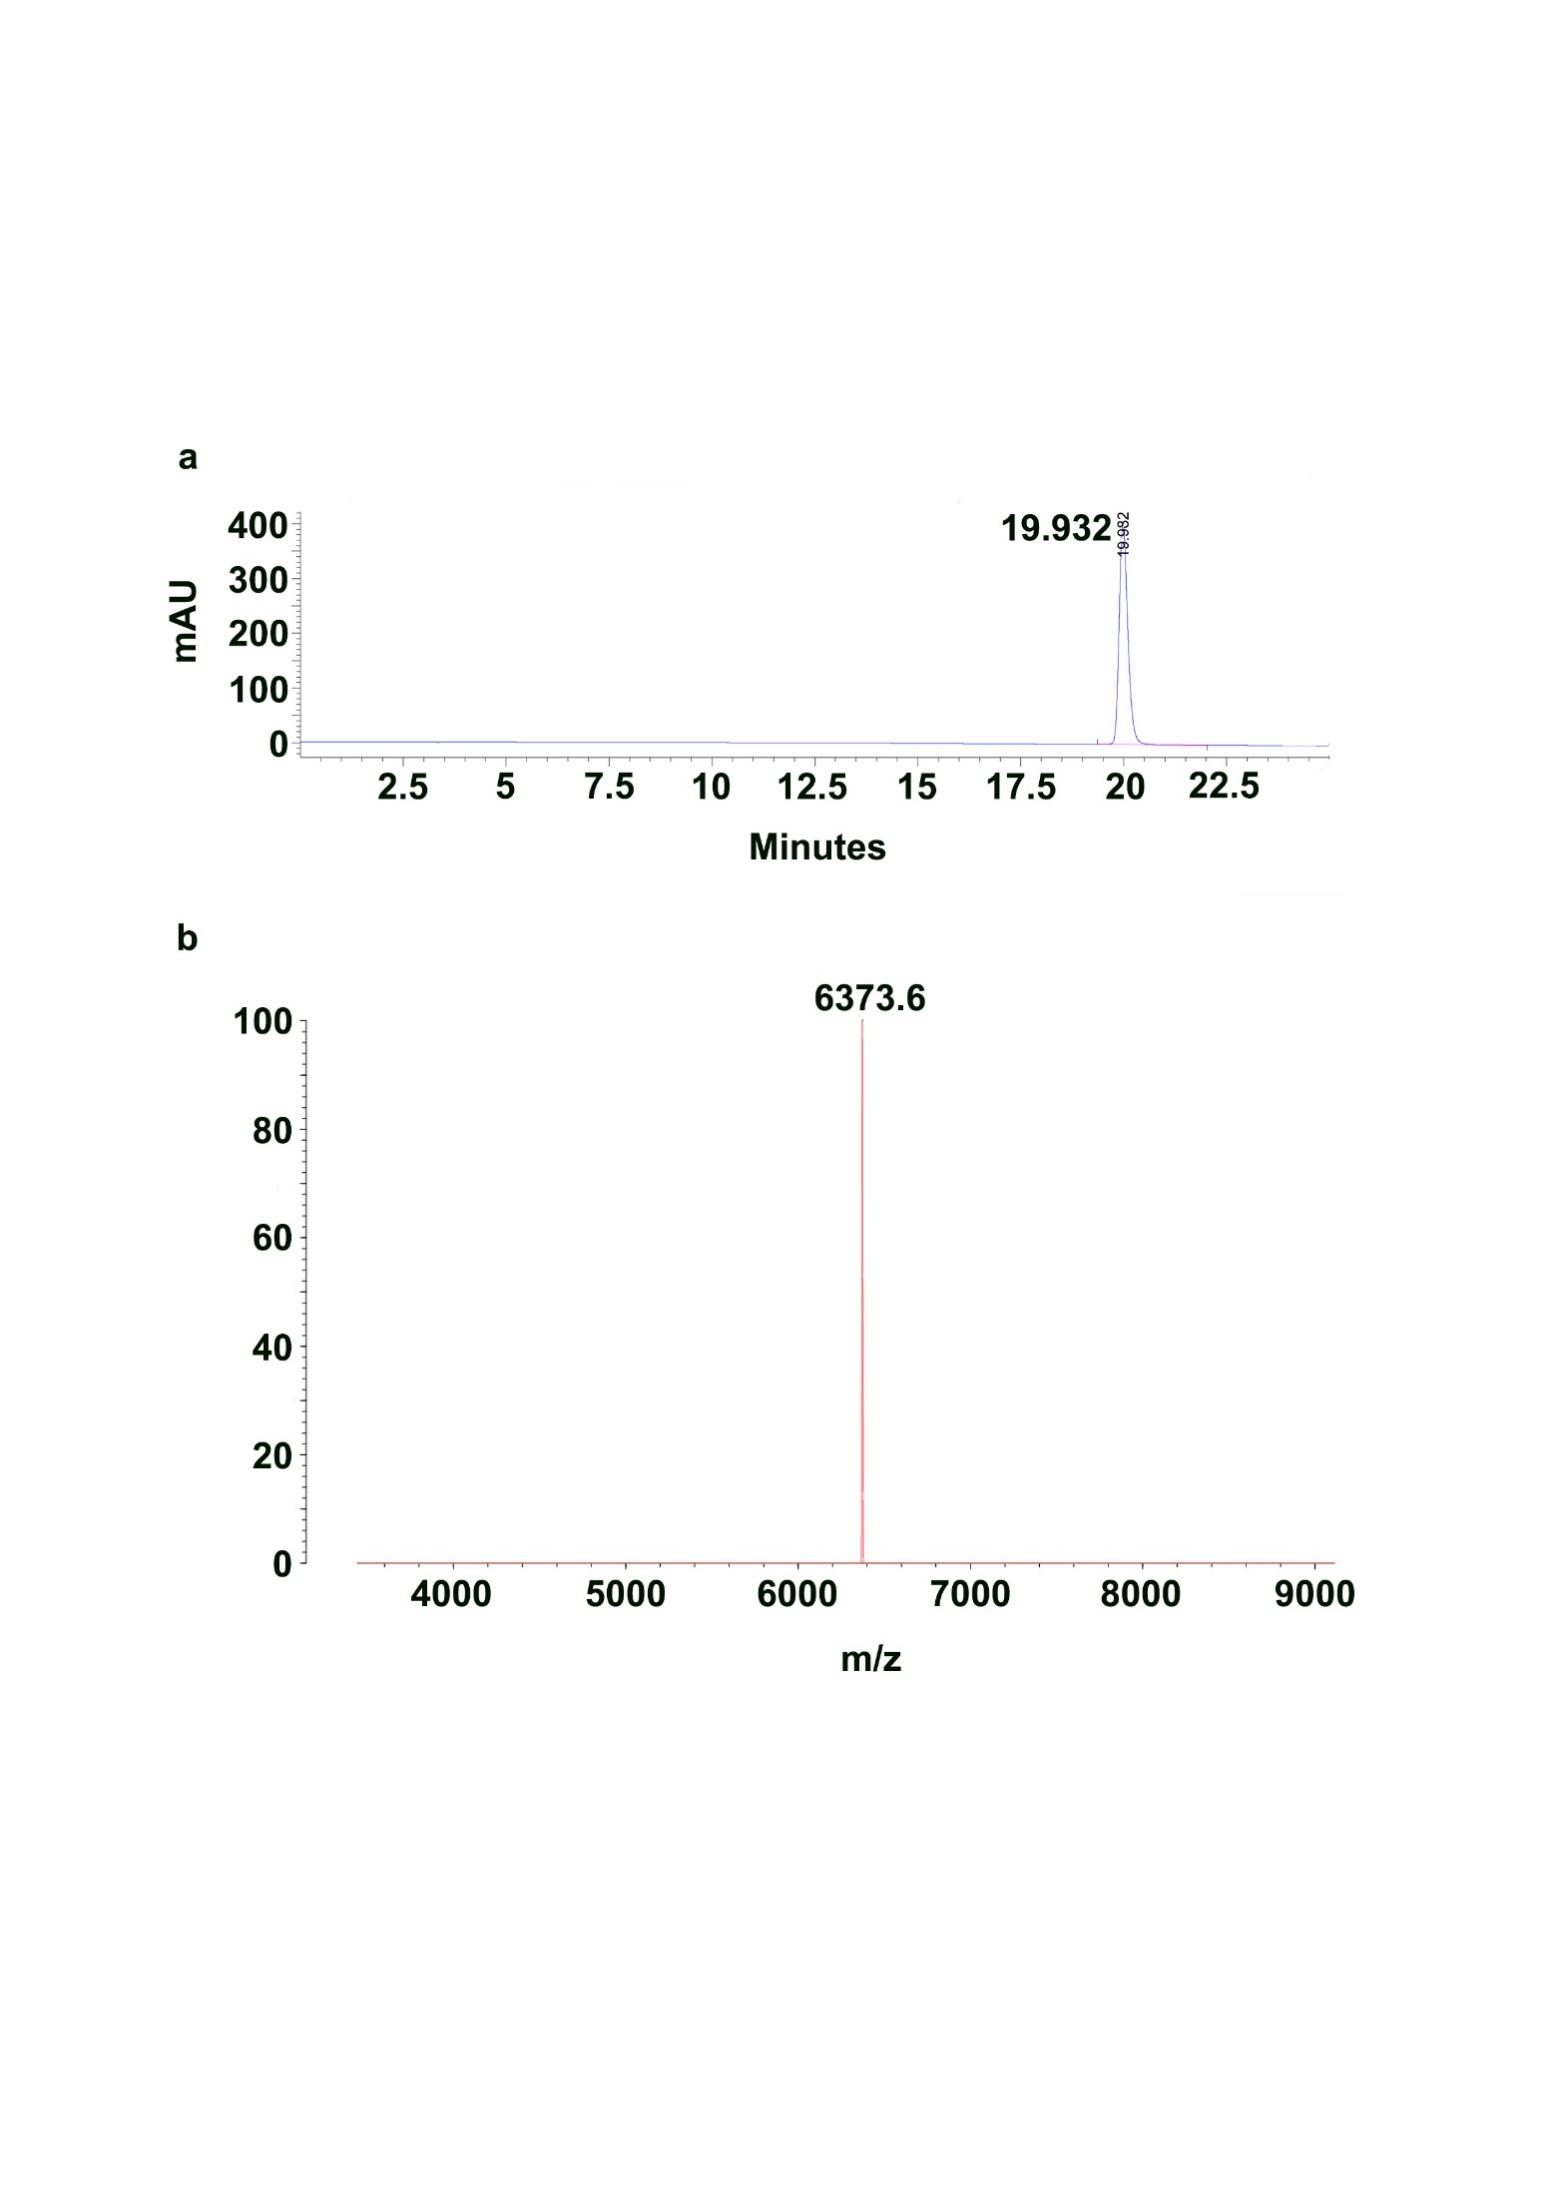
**

**Supplementary Fig. 2 Characterization of asPNA-cy7.5.** High-performance liquid chromatography (HPLC) (**a**) and MS spectra of asPNA-cy7.5 (**b**).

**
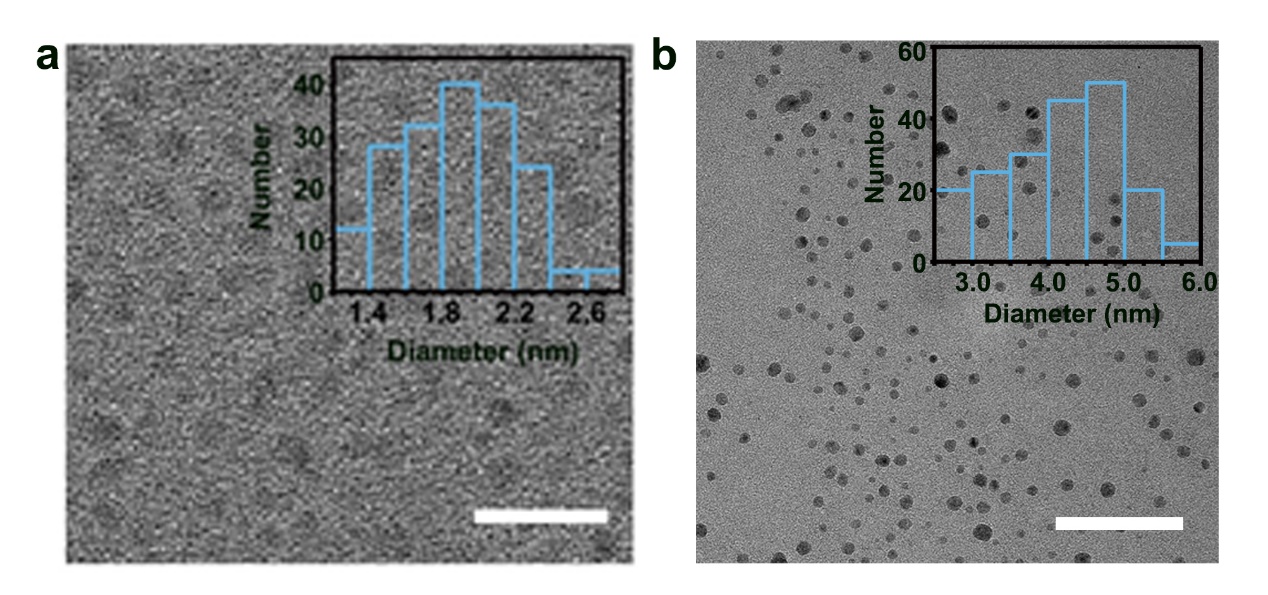
**

**Supplementary Fig. 3** TEM image and corresponding size distribution (Inset) of SiNPs (a) and GP-SiNPs-asPNA (b). Scale bars: 20 nm.

**
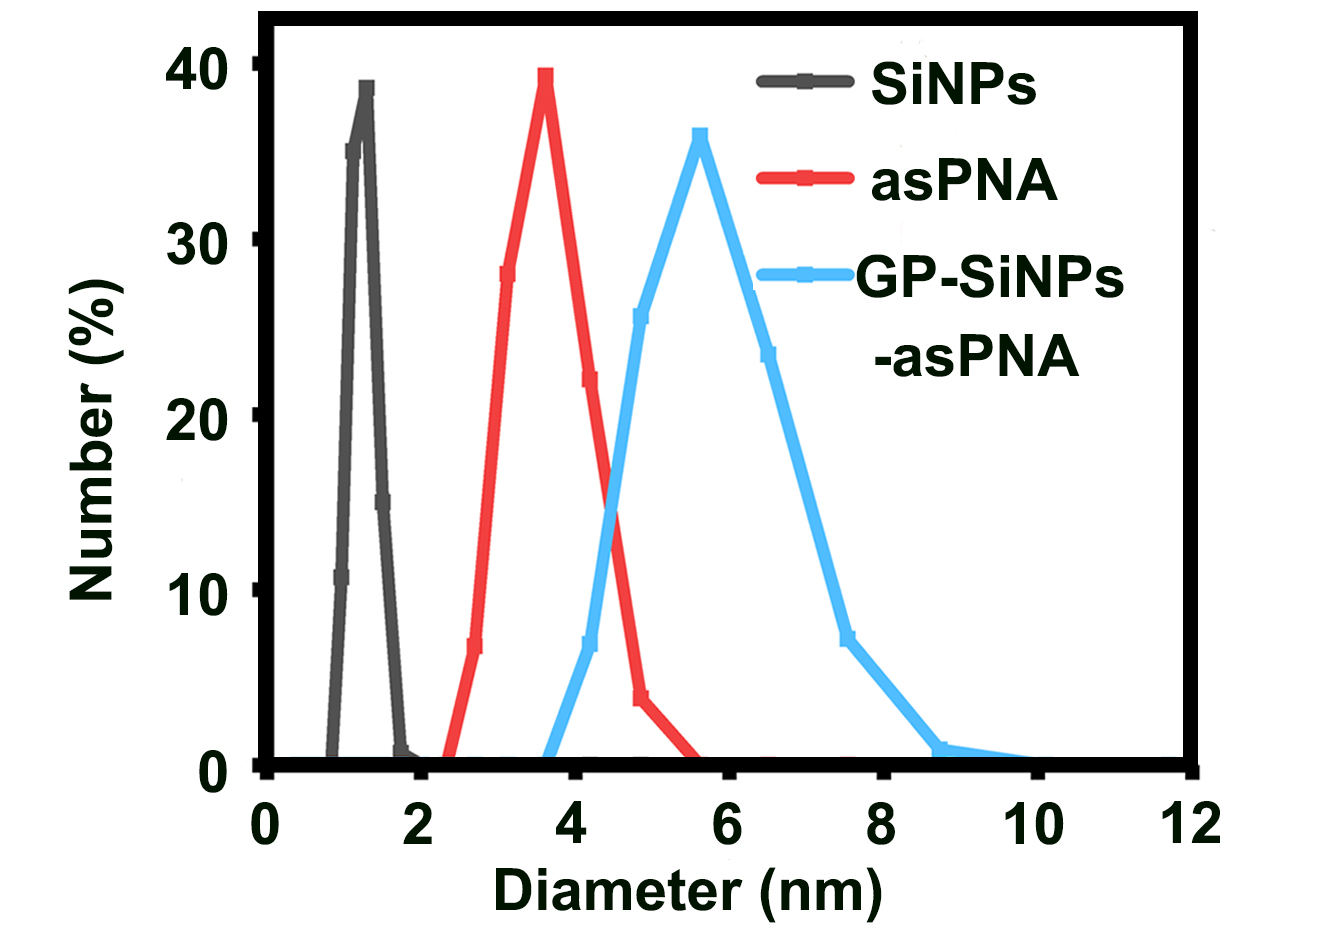
**

**Supplementary Fig. 4** DLS data of SiNPs, asPNA and GP-SiNPs-asPNA.

**
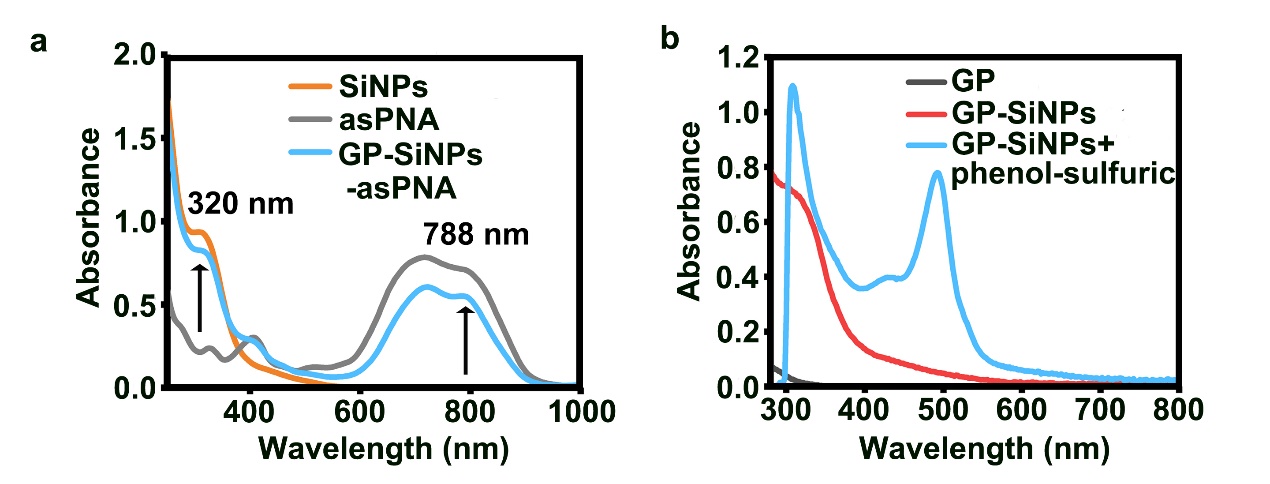
**

**Supplementary Fig. 5** (a) UV-vis absorption spectra of SiNPs, asPNA and GP-SiNPs-asPNA. (b) UV-vis absorption spectra of GP, GP-SiNPs, and GP-SiNPs treated with phenol-sulfuric acid (GP-SiNPs+phenol-sulfuric).

**
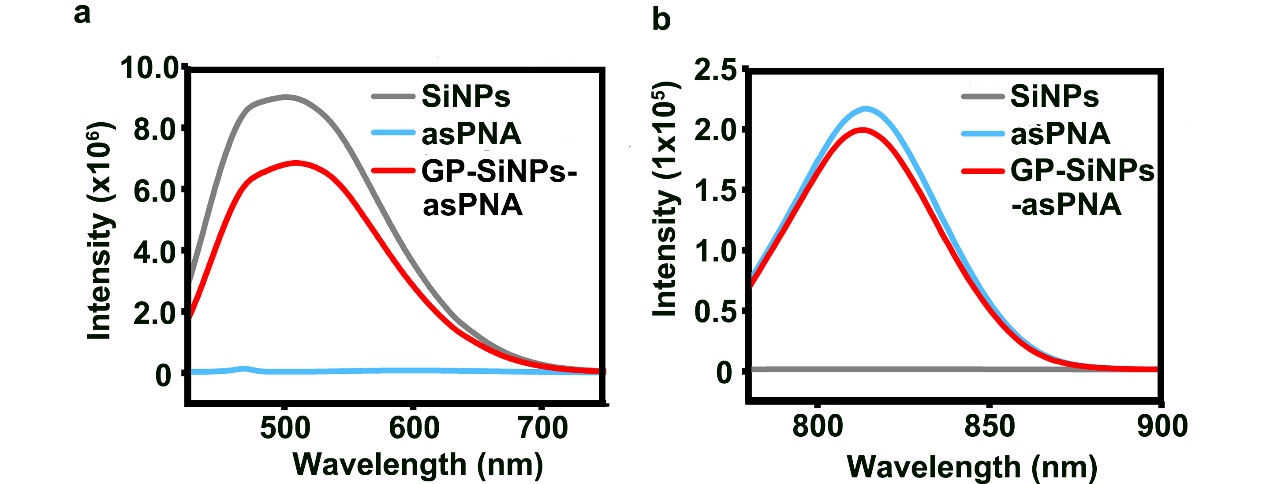
**

**Supplementary Fig. 6** Photoluminescence (PL) spectra of SiNPs, asPNA and GP-SiNPs-asPNA under excitation at 405 nm (**a**) and 788 nm (**b**).

**
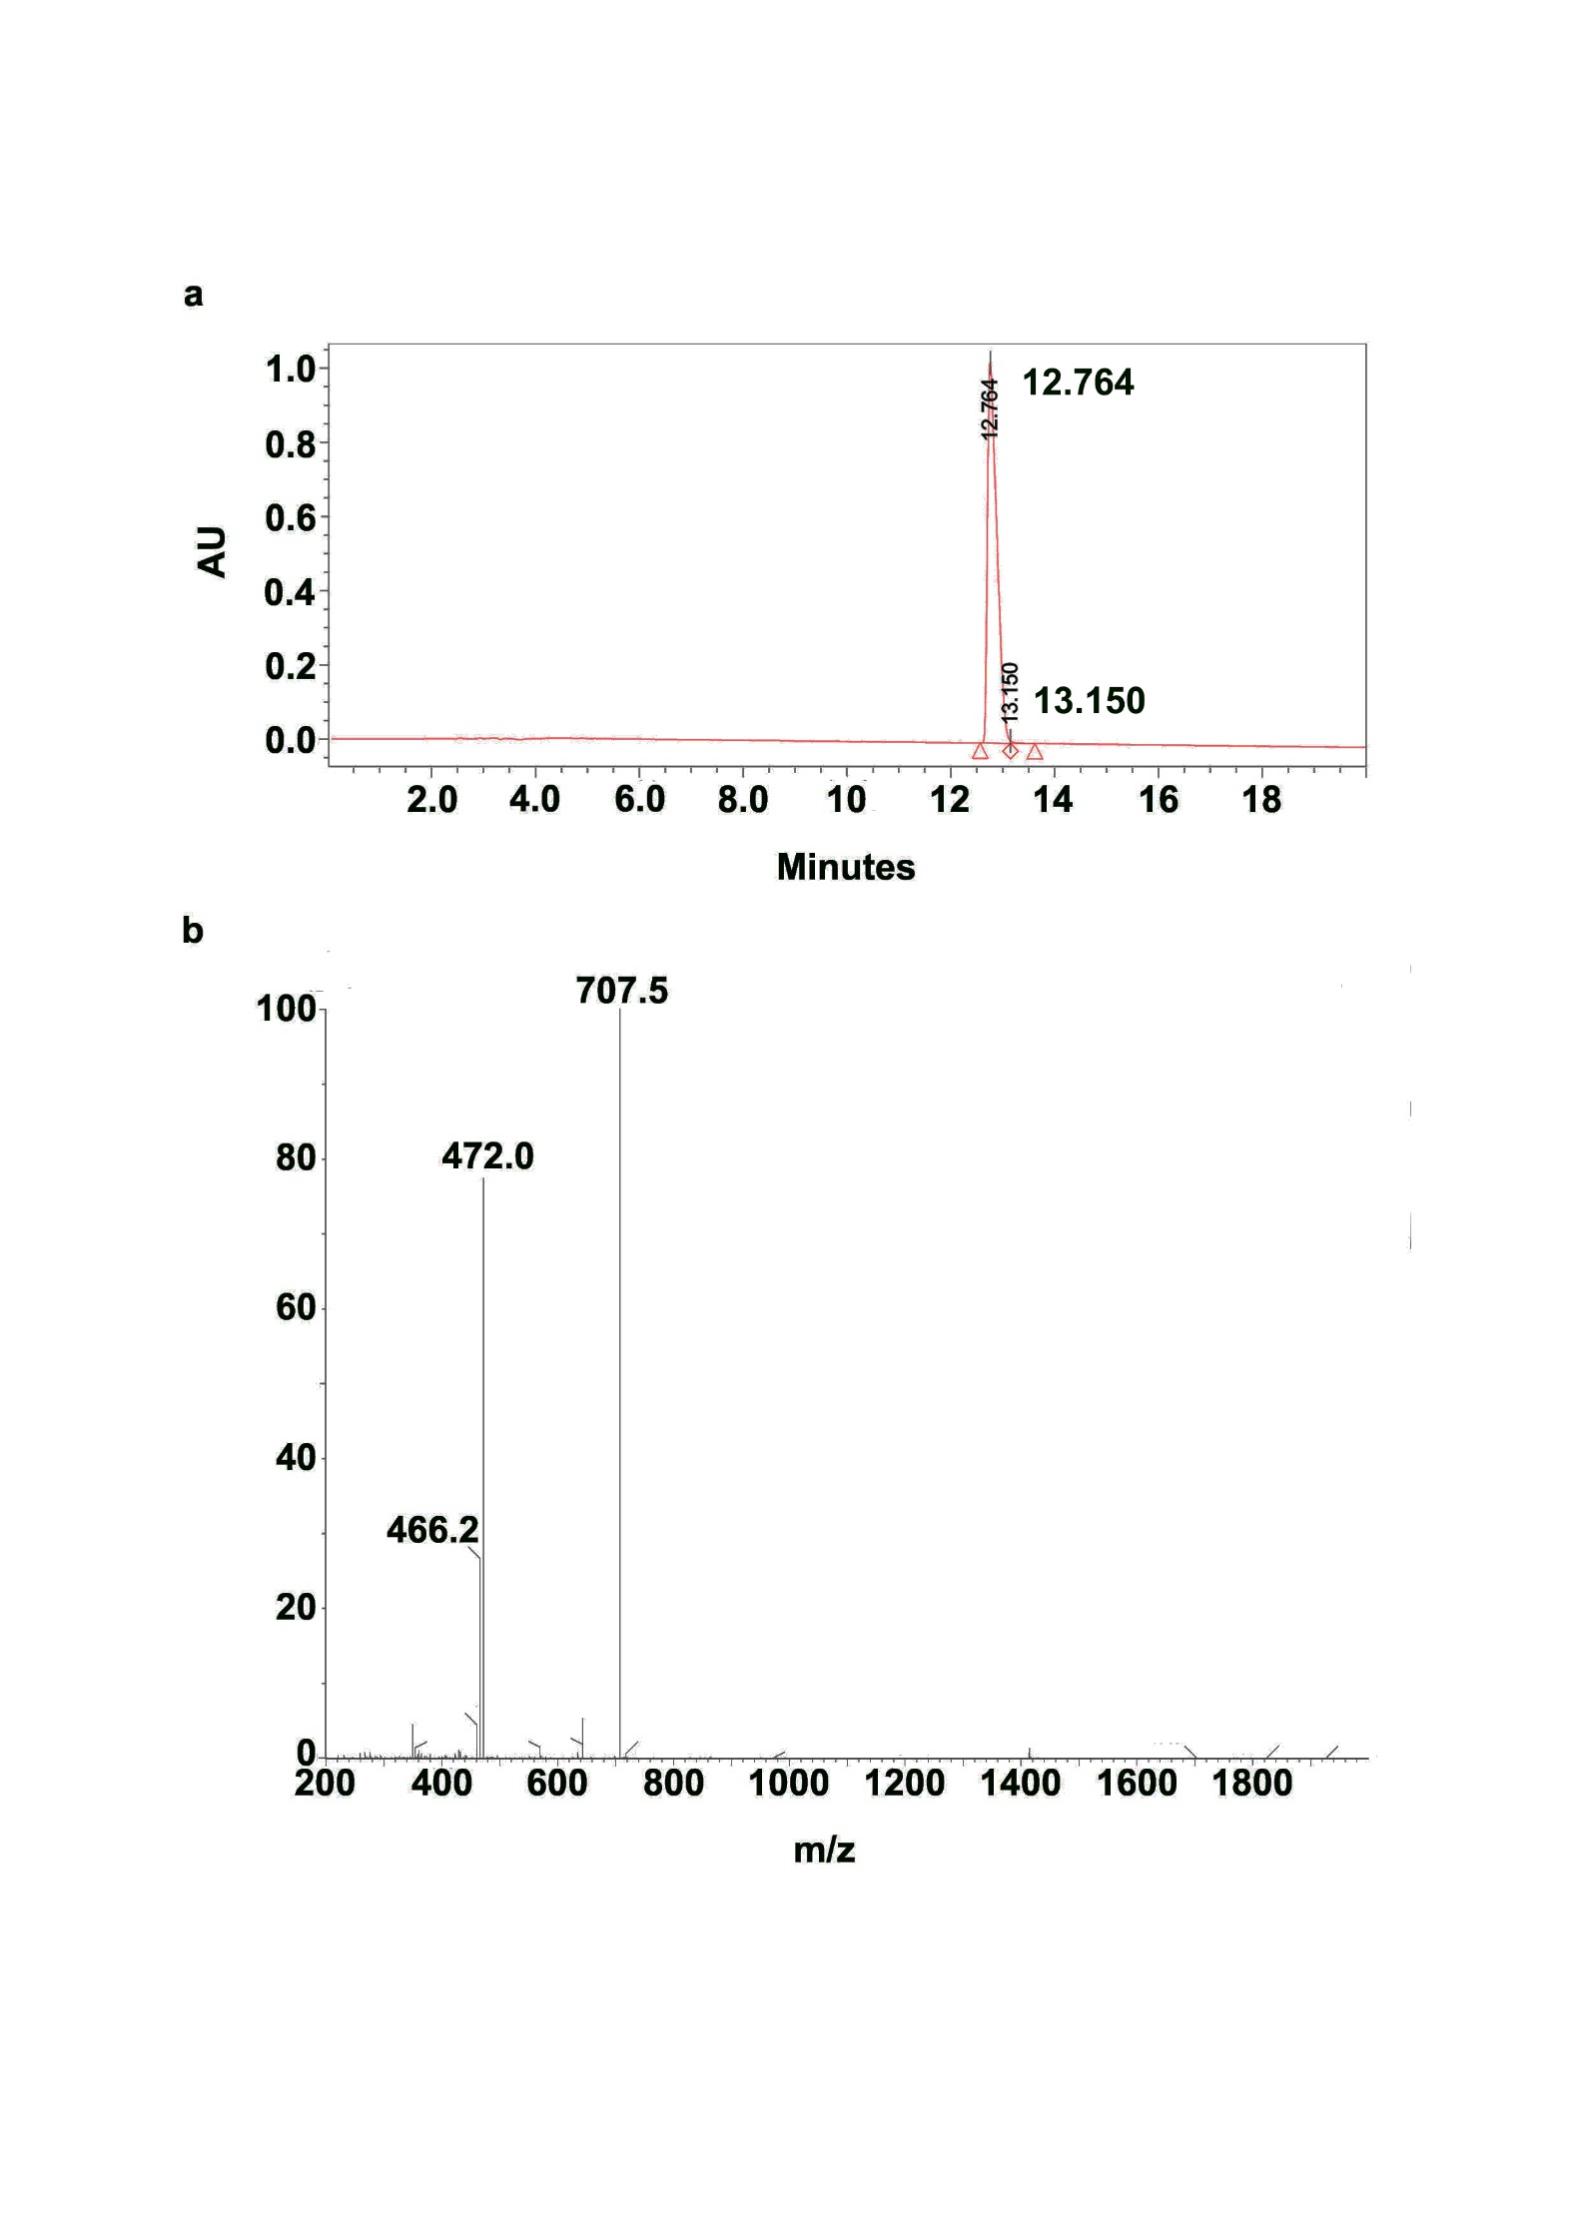
**

**Supplementary Fig. 7 Characterization of (KFF)3K.** High-performance liquid chromatography (HPLC) (**a**) and mass spectra of (KFF)3K (**b**).

**
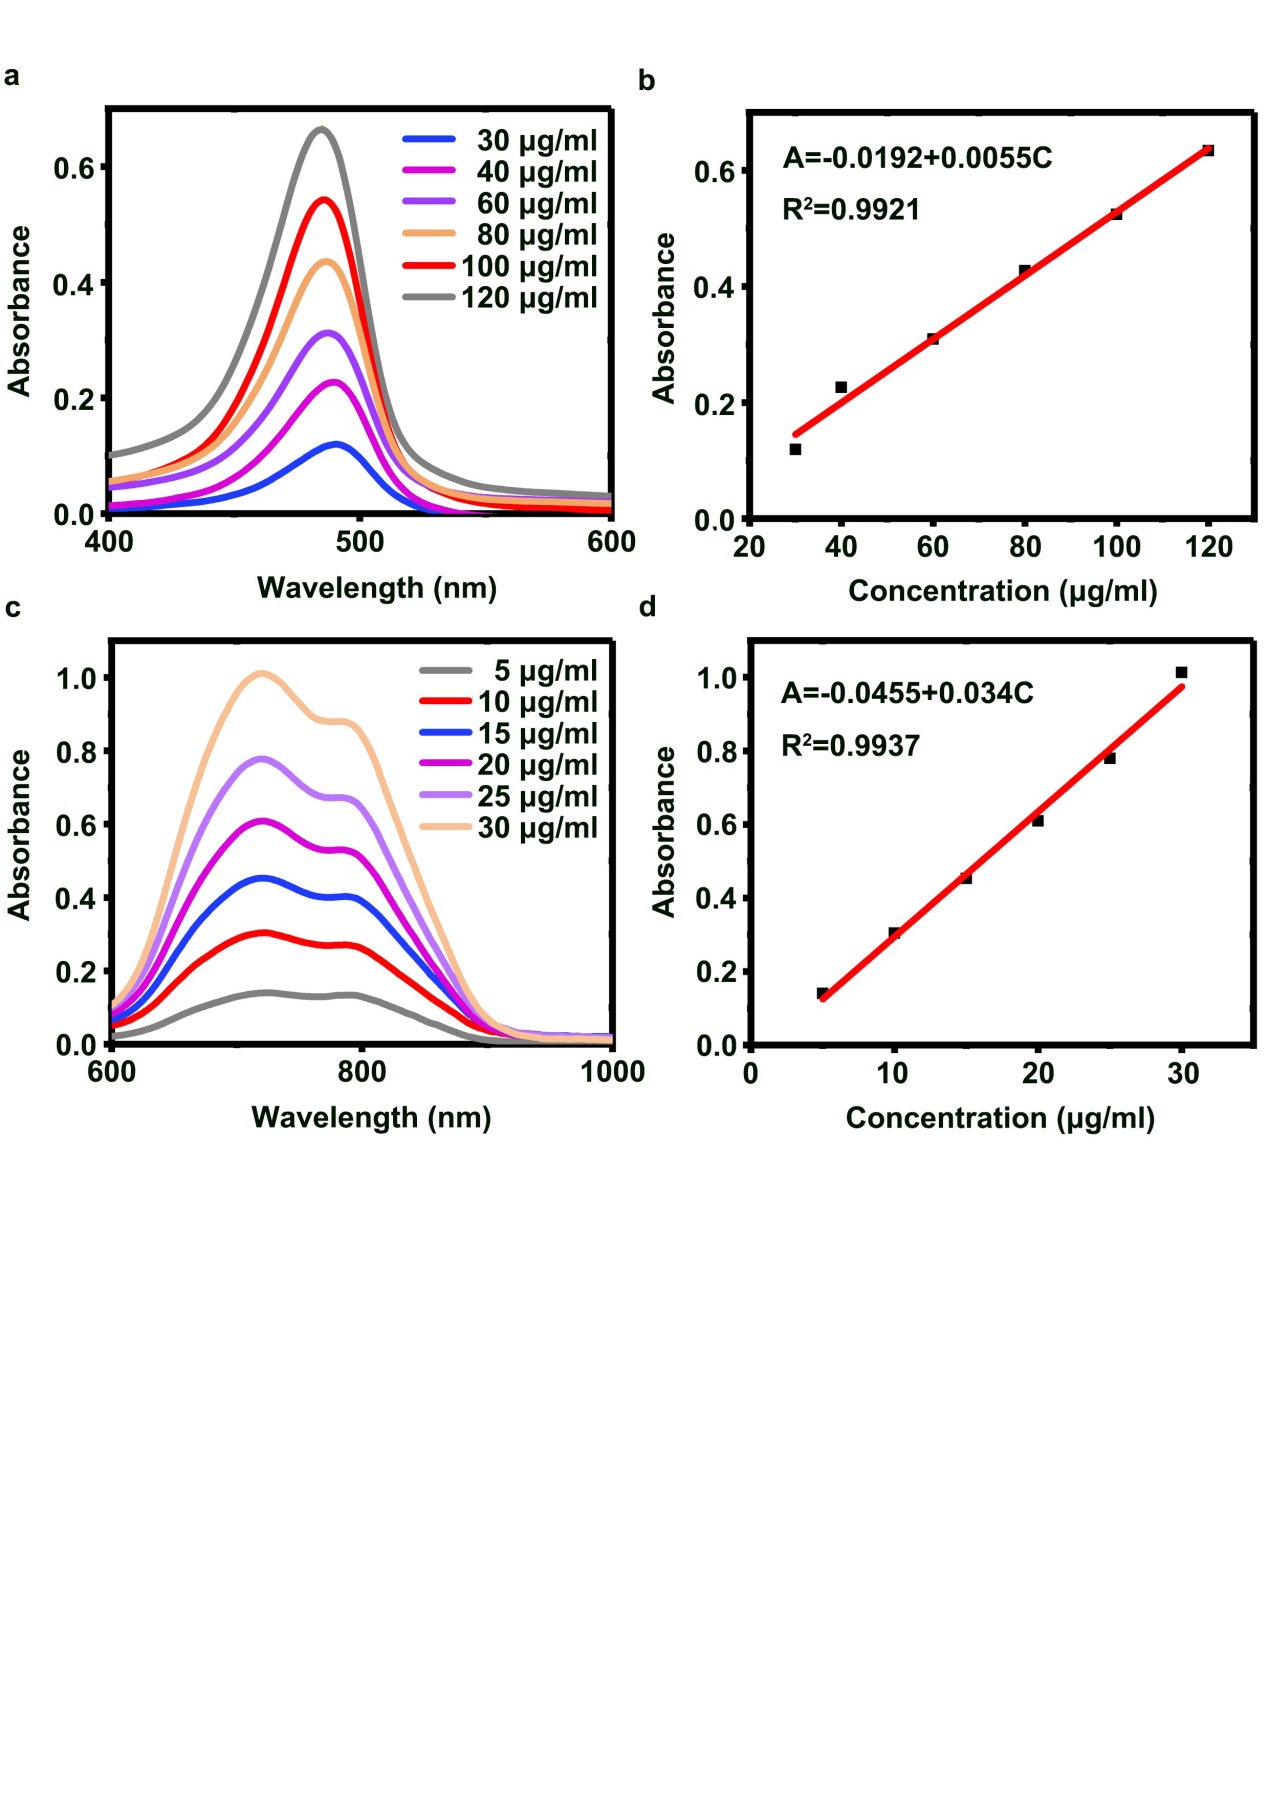
**

**Supplementary Fig. 8 Quantification of GP and asPNA-Cy7.5.** UV-vis absorption spectra of GP with various concentrations ranged from 30 to 120 μg/mL treated by the same amount of phenol-sulfuric acid **(a)** and corresponding calibration curve **(b)**. UV-vis absorption spectra of asPNA-Cy7.5 with various concentrations ranged from 0 to 30 μg/mL **(c)** and corresponding calibration curve **(d)**.

**
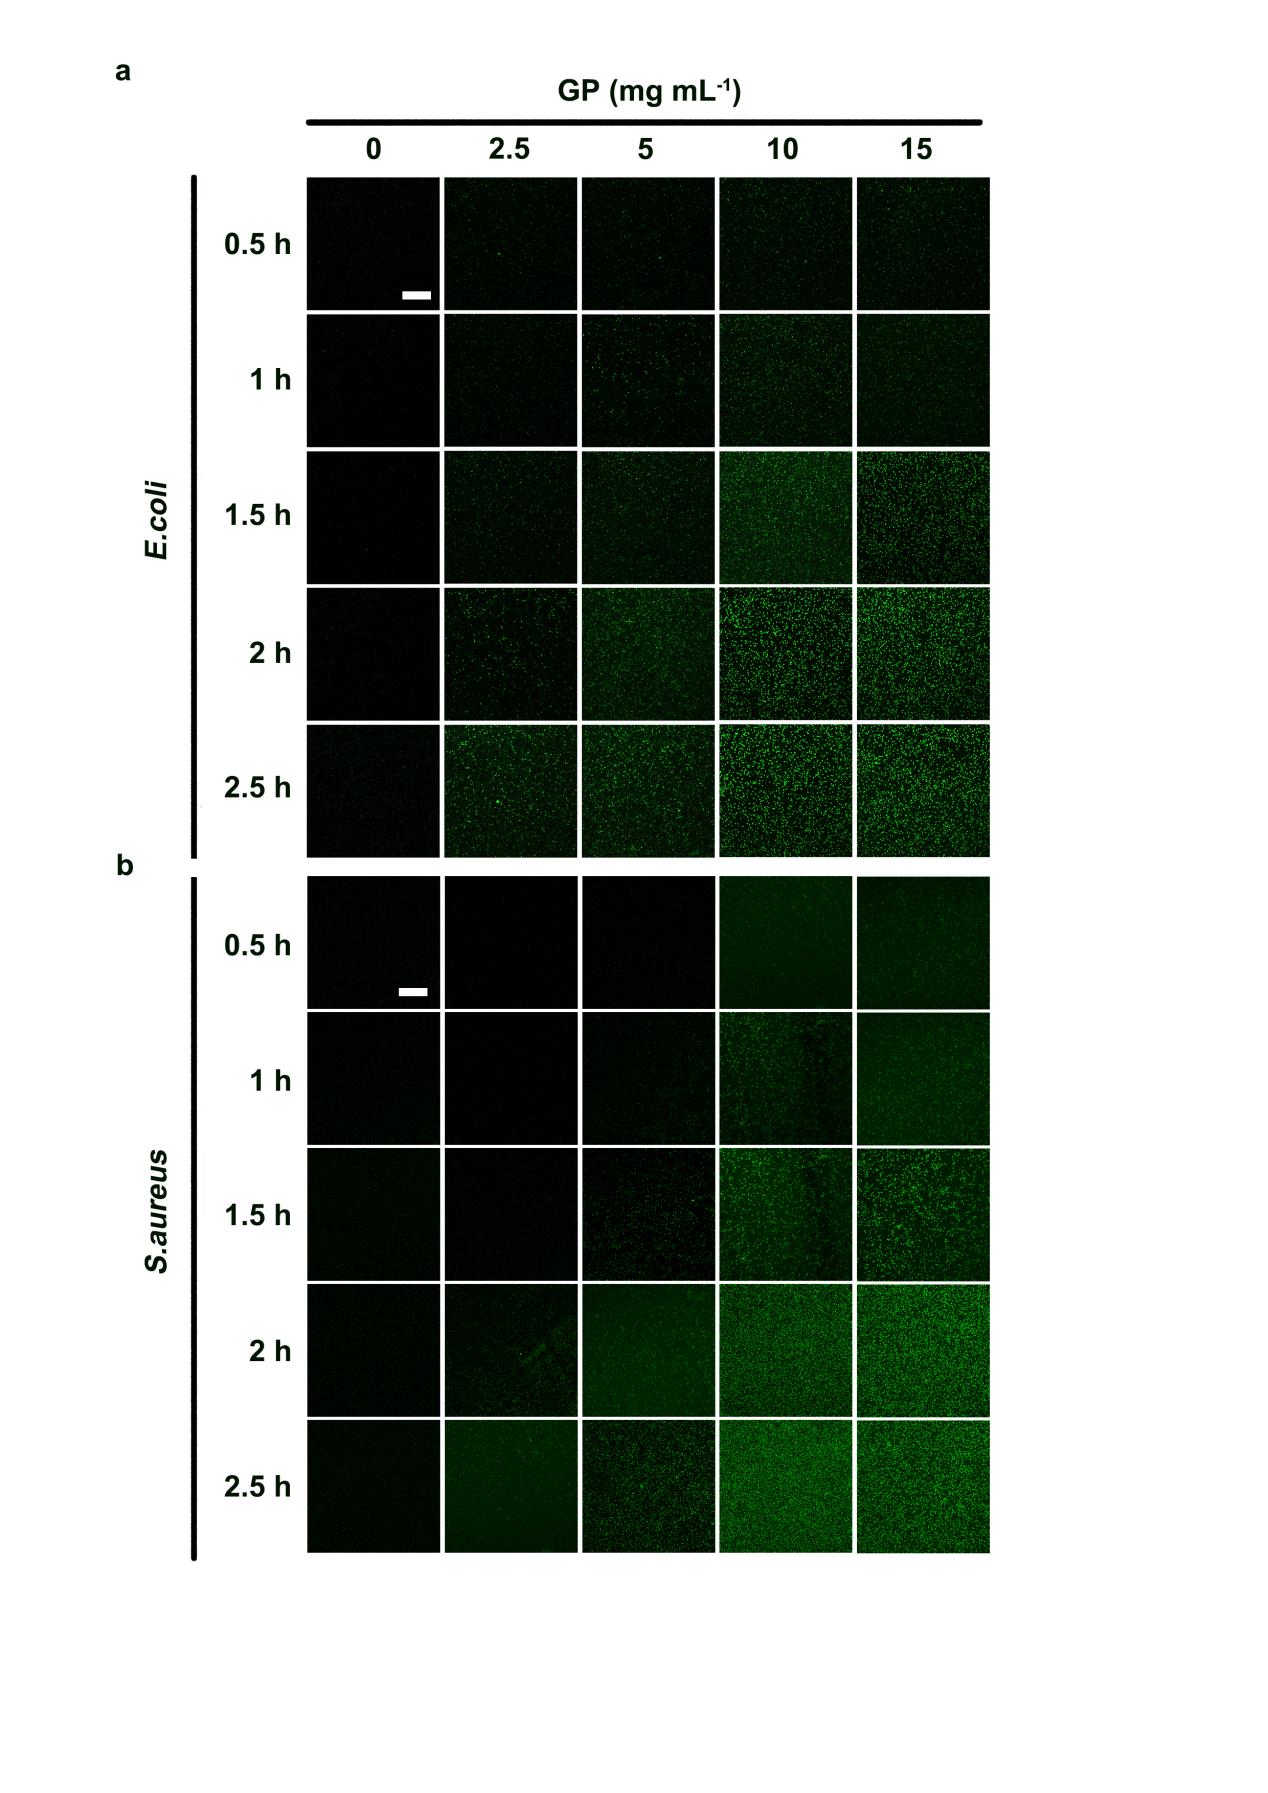
**

**Supplementary Fig. 9 The effects of GP concentration and incubation time** **on the uptake of GP-SiNPs-asPNA by bacteria. a,** The confocal images of *E. coli* co-incubated with GP-SiNPs-asPNA with GP concentration (0, 2.5, 5, 10, 15 mg/mL) at 37 oC for 0.5 h, 1 h, 1.5 h, 2 h and 2.5 h, respectively. Scale bar: 10 μm. **b,** The confocal images of *S. aureus* co-incubated with GP-SiNPs-asPNA with GP concentration (0, 2.5, 5, 10, 15 mg/mL) at 37 oC for 0.5 h, 1 h, 1.5 h, 2 h and 2.5 h, respectively.Scale bar: 10 μm.

**
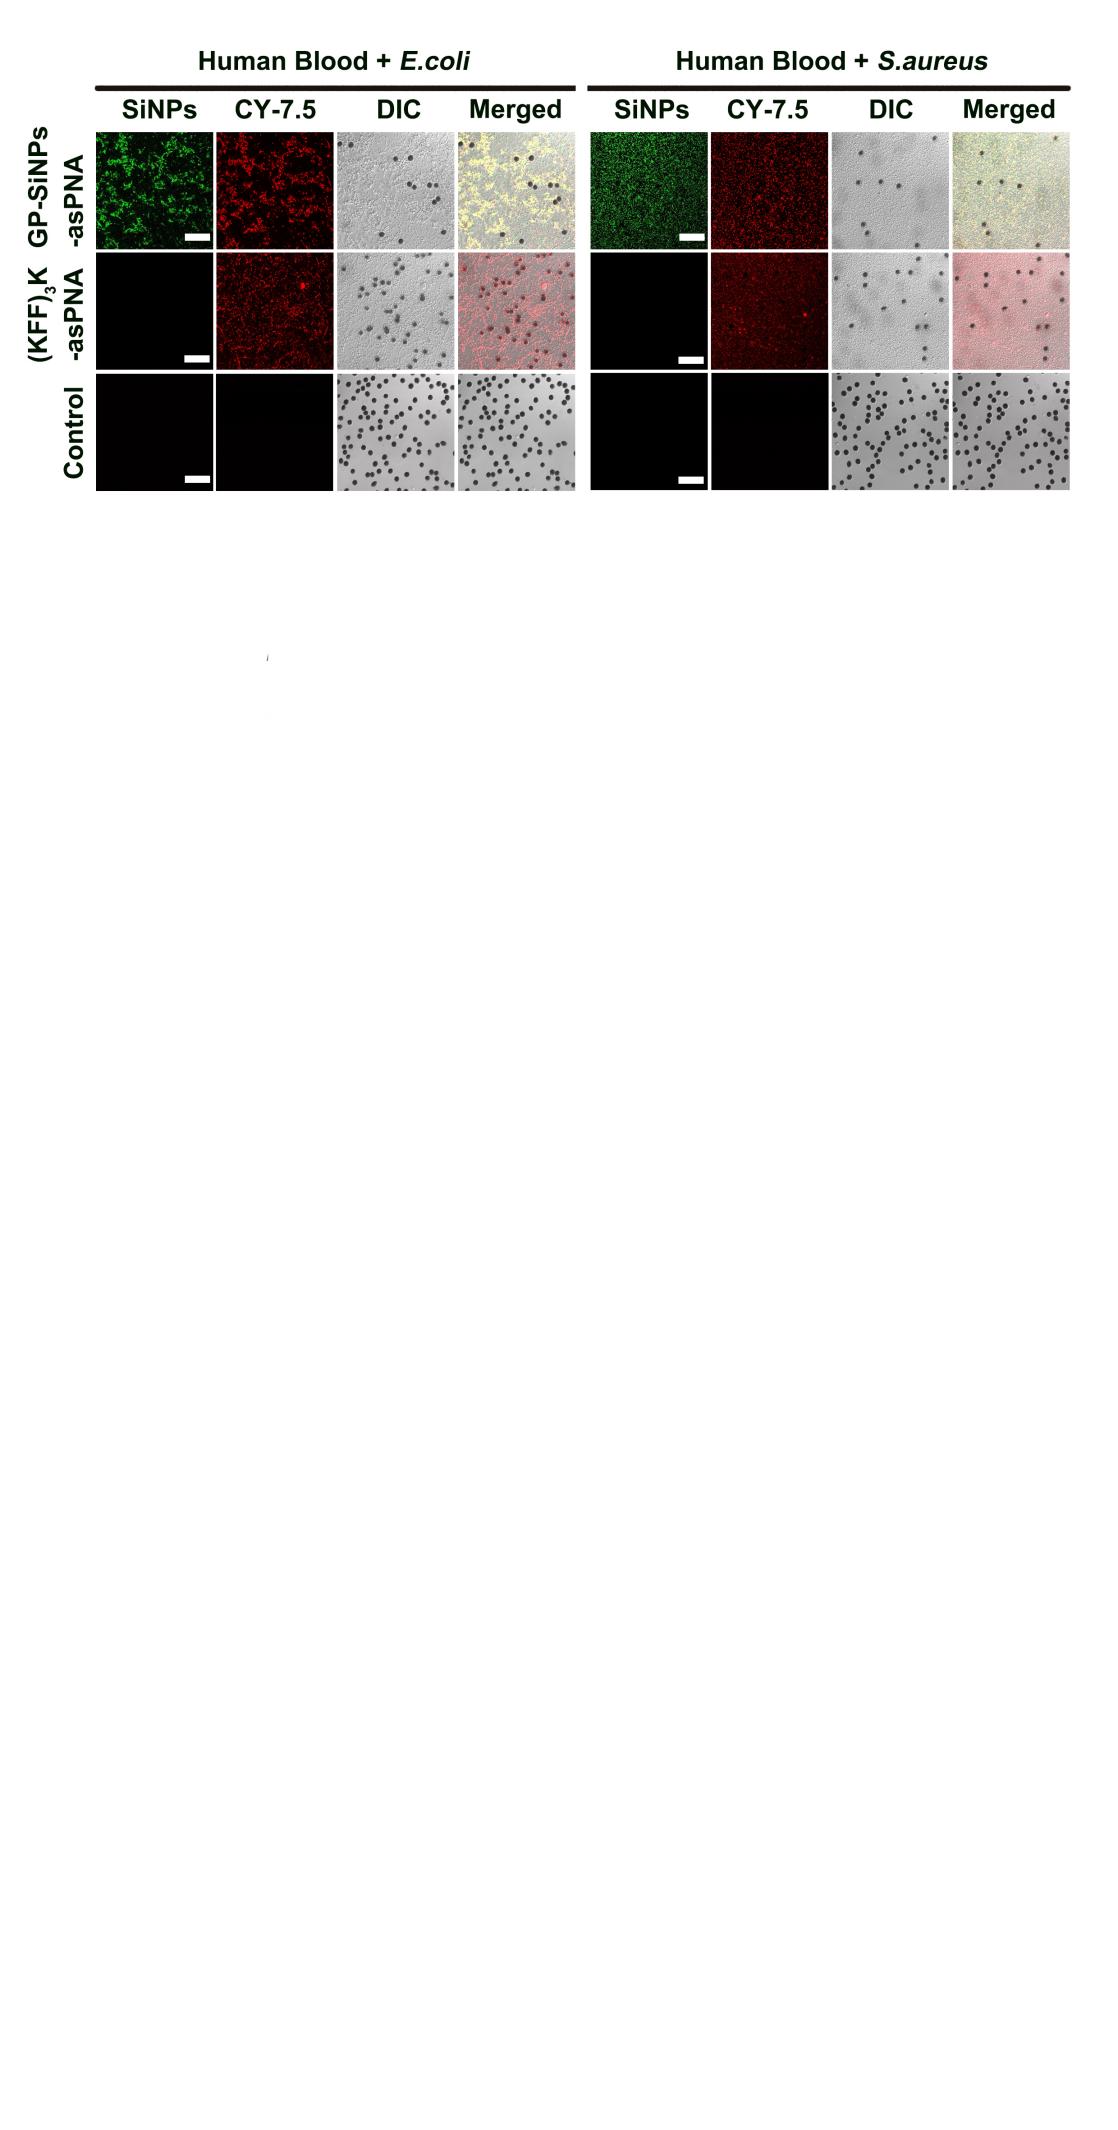
**

**Supplementary Fig. 10** Confocal fluorescence images of the mixture of human blood and bacteria (*E. coli* or *S. aureus*) after incubation with GP-SiNPs-asPNA or (KFF)3K-asPNA. Scale bar: 10 μm.

**
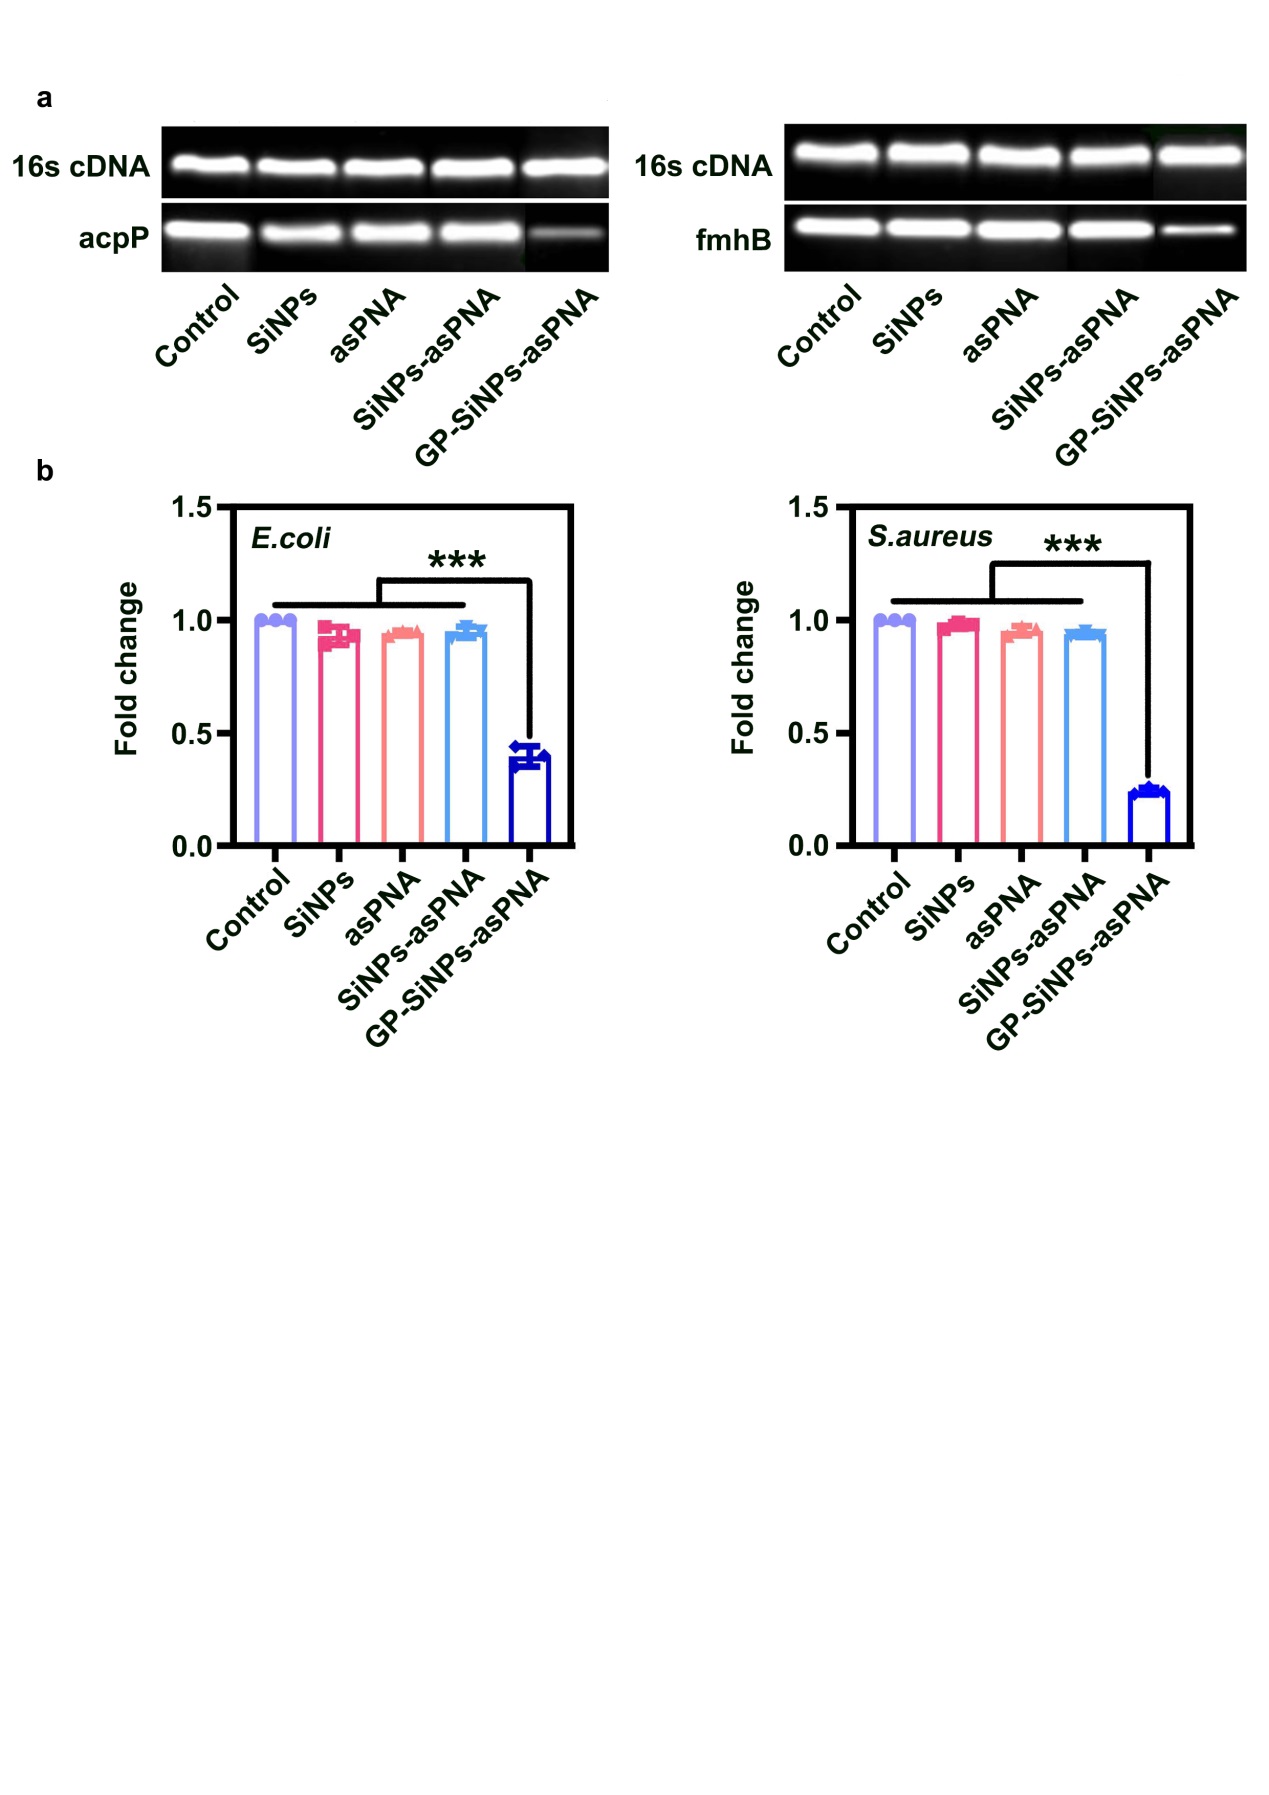
**

**Supplementary Fig. 11 The inhibition of gene expression in *E. coli* and *S. aureus*. a,** Semiquantitative analysis of gene expressions of *acpP* gene and *fmhB* gene in bacteria incubated with GP-SiNPs-asPNA for 12 h by gel electrophoresis. **b,** Quantitative analysis of gene expressions of *acpP* gene and *fmhB* gene in bacteria incubated with GP-SiNPs-asPNA for 12 h by real-time PCR (RT-PCR). Error bars represent the standard deviation obtained from three independent measurements (*** means *p* < 0.001).**
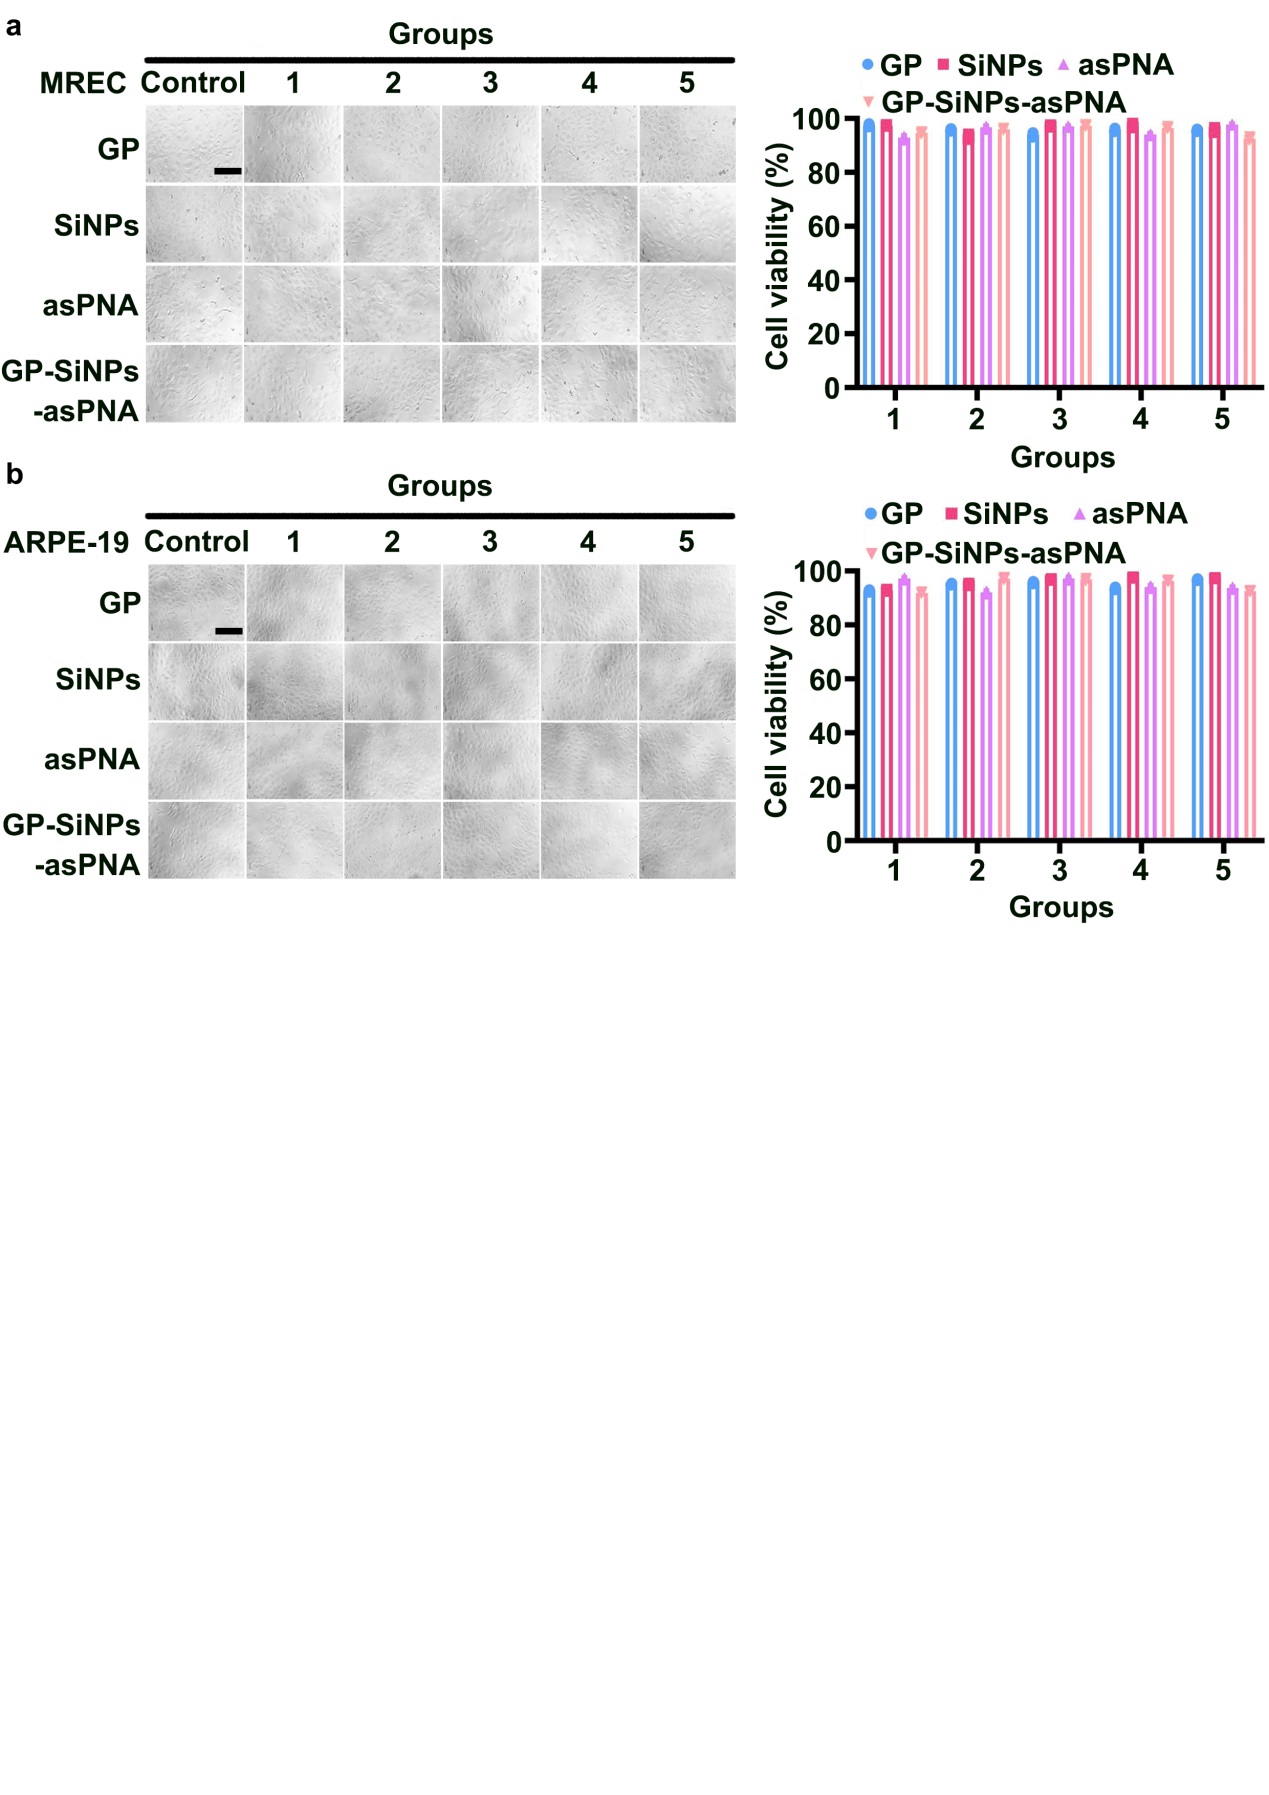
**

**Supplementary Fig. 12 In vitro toxicity assays. a-b,** Cell morphology and viability of MREC (**a**) and ARPE-19 cells (**b**) treated with different dosages of GP, SiNPs, asPNA and GP-SiNPs-asPNA for 24 h, respectively. The groups of “Control, 1, 2, 3, 4, 5”represent series of concentrations of GP (0, 0.313, 0.625, 1.25, 2.5, 5 mg mL-1), SiNPs (0, 0.625, 1.25, 2.5, 5, 10 mg mL-1), asPNA (0, 62.5, 125, 250, 500, 1000 nM) and GP-SiNPs-asPNA (0, 62.5, 125, 250, 500, 1000 nM). All error bars represent the standard deviation determined from three independent assays.

**
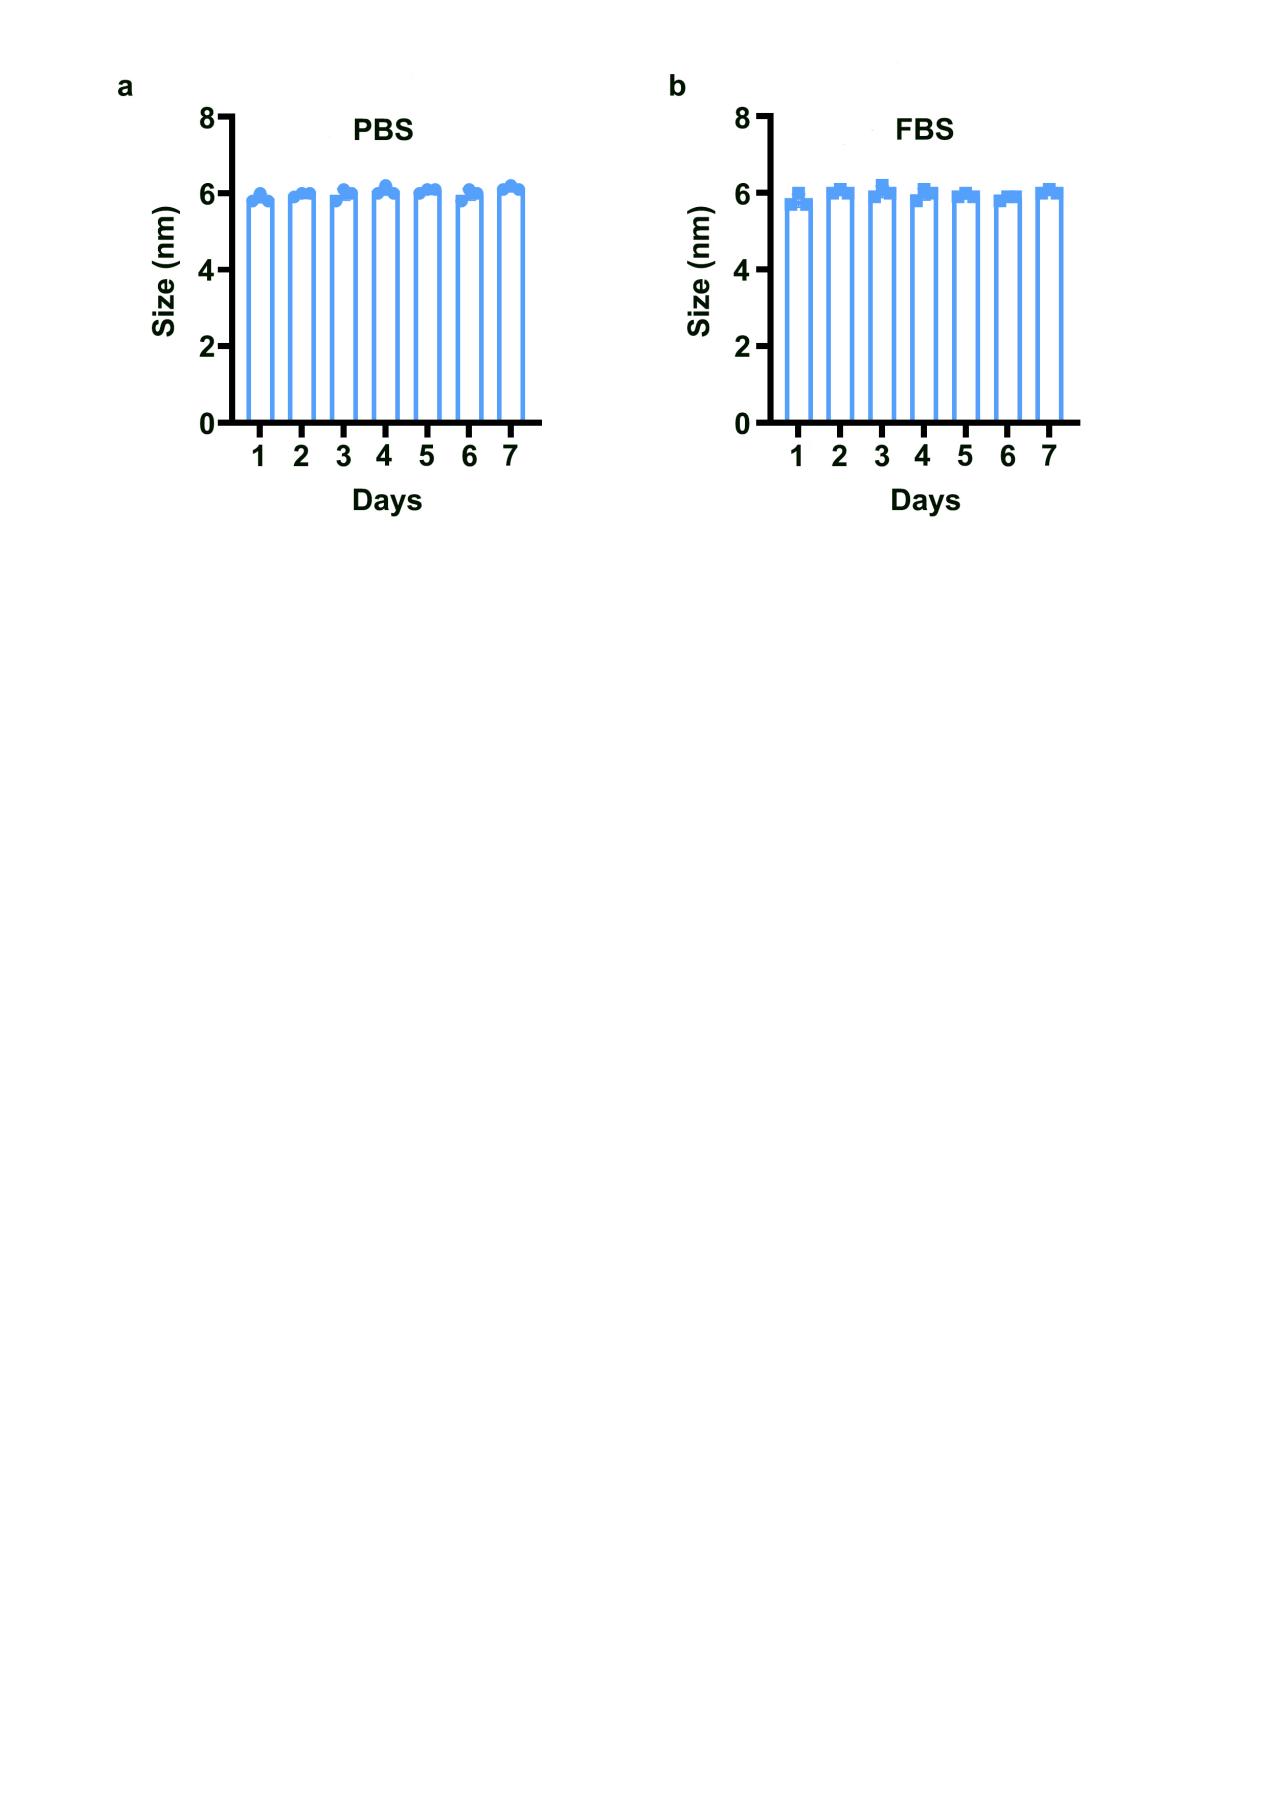
**

**Supplementary Fig. 13 Stability of GP-SiNPs-asPNA and Loading efficacy of asPNA. a,** DLS analysis of GP-SiNPs-asPNA after an incubation in PBS (pH = 7.4) for 0-7 day. **b,** DLS analysis of GP-SiNPs-asPNA after an incubation in 10% FBS for 0-7 day. Error bars represent the standard deviation obtained from three independent measurements.


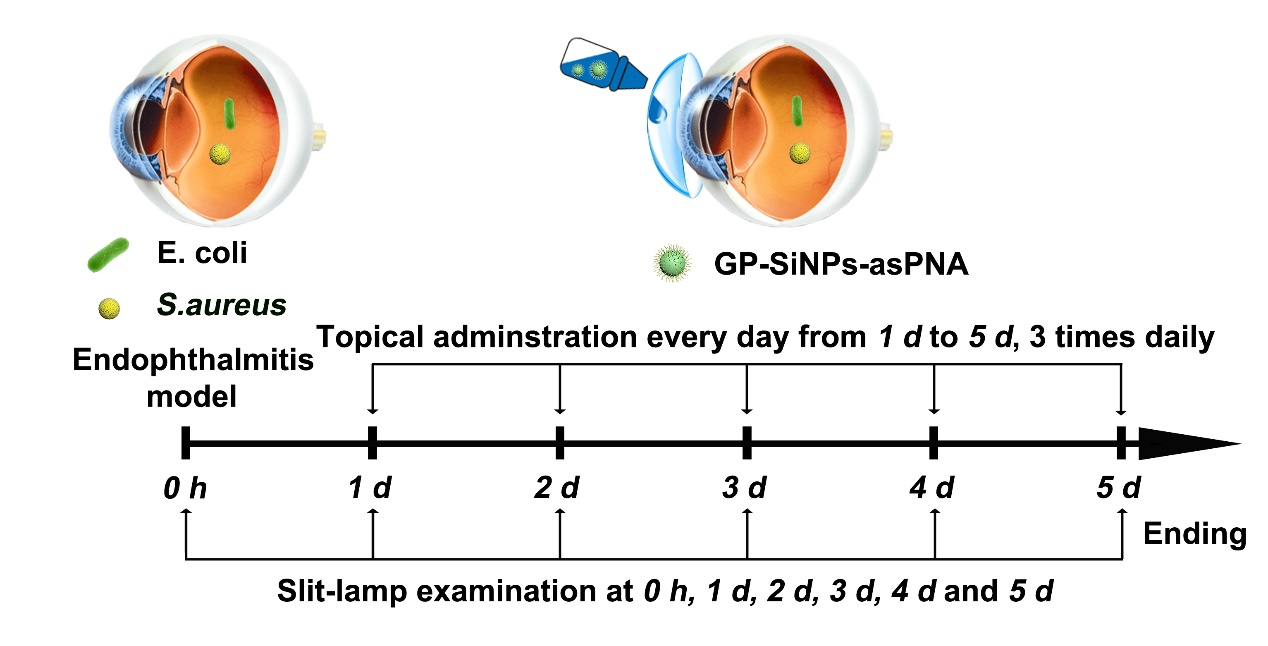


**Supplementary Fig. 14** Scheme illustrating the construction of the model of bacterial endophthalmitis in mice and the corresponding treatment procedures.


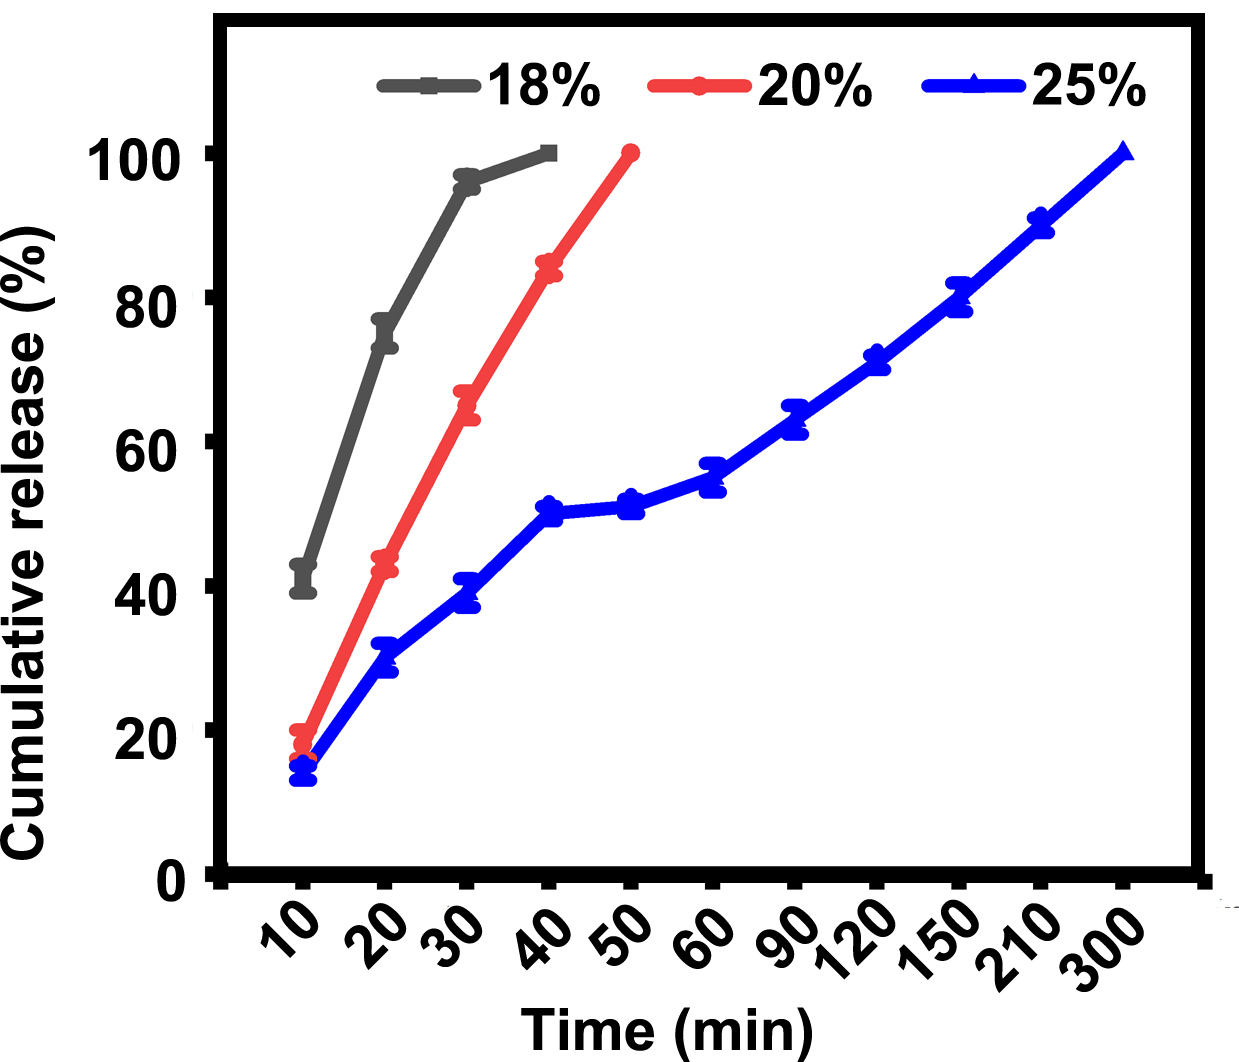


**Supplementary Fig. 15** Time-dependent release curves of GP-SiNPs-asPNA in gelling systems with different mass fractions.Error bars represent the standard deviation obtained from three independent measurements


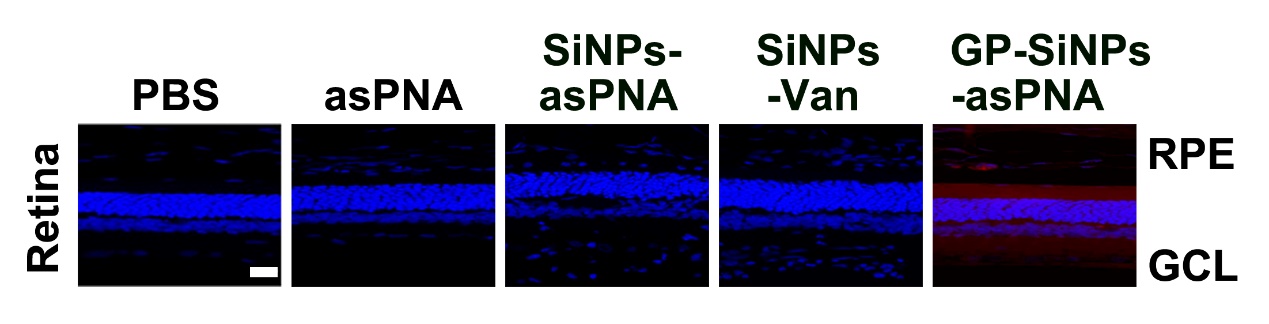


**Supplementary Fig. 16** Intraocular distribution of GP-SiNPs-asPNA in retinas from 3.0×106 CFU *E. coli-* and *S. aureus* (*E. coli* + *S. aureus*)-induced endophthalmitis mice with different treatments (e.g., PBS, asPNA (1 μM), SiNPs-asPNA (1 μM), SiNPs-Van (10 mg mL-1) or GP-SiNPs-asPNA (1 μM) (1 drop per time, 3 times per day)). RPE, retinal pigment epithelium; GCL, ganglion cell layer.


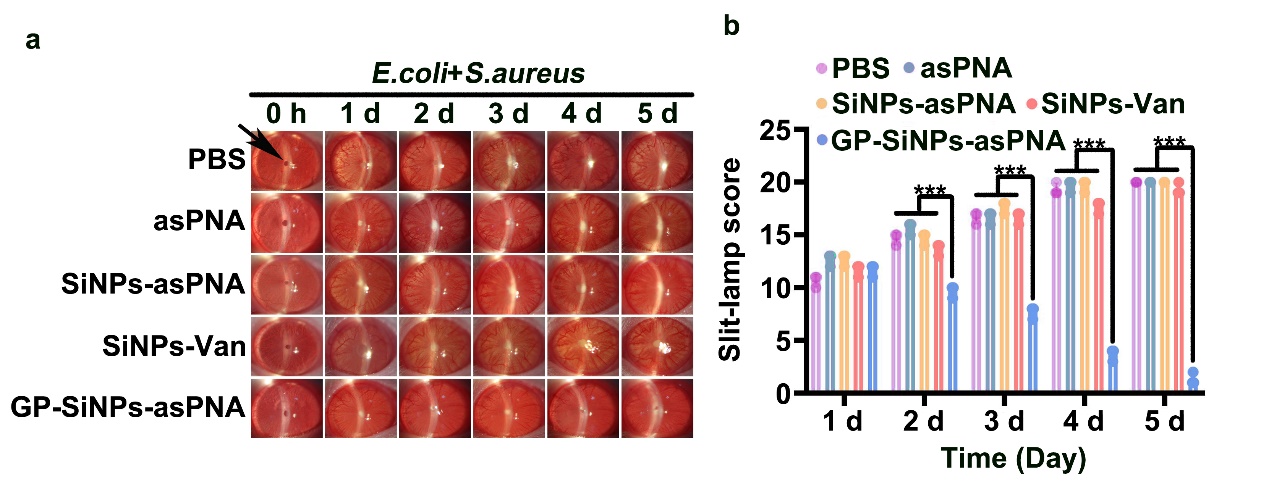


**Supplementary Fig. 17** Daily slit-lamp microscopic images of anterior segment of(*E. coli* + *S. aureus*)-induced endophthalmitis mice with different treatments (**a**), and corresponding histograms of silt-lamp examination scores (**b**). The black arrow in slit-lamp images indicates the position of the pupil. Statistical analysis was performed using one-way ANOVA. Error bars represent the standard deviation obtained from three independent measurements (*** means *p* < 0.001, n = 3).

**
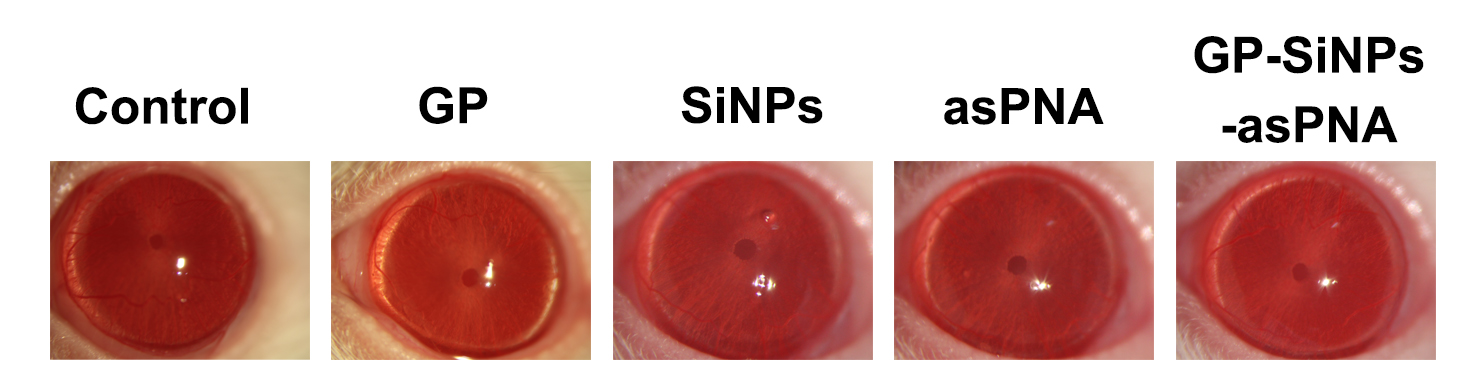
**

**Supplementary Fig. 18** Slit-lamp microscope image of eyeballs of healthy mice treated with GP (5 mg mL-1), SiNPs (10 mg mL-1), asPNA (1 μM) and GP-SiNPs-asPNA (1 μM) for 24 h, respectively.


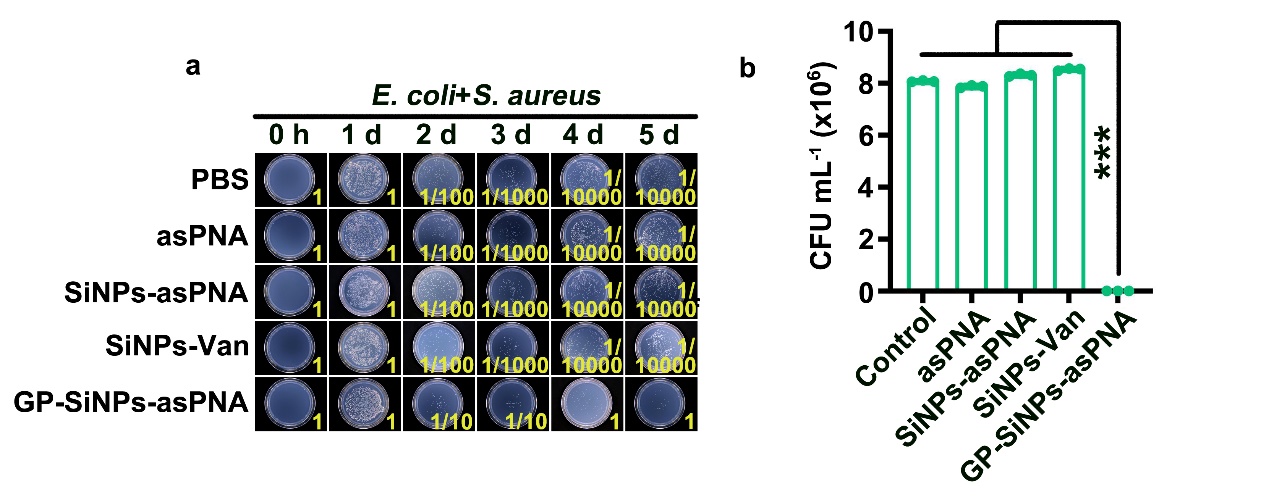


**Supplementary Fig. 19** Homogenates ofeyeball of (*E. coli* + *S. aureus*)-induced endophthalmitis mice with different treatments for 0, 1, 2, 3, 4 and 5 d cultured on the solid LB agar (n=3) (**a**) and corresponding quantification of bacterial colonization (**b**).Error bars represent the standard deviation obtained from three independent measurements (*** means *p* < 0.001).

**
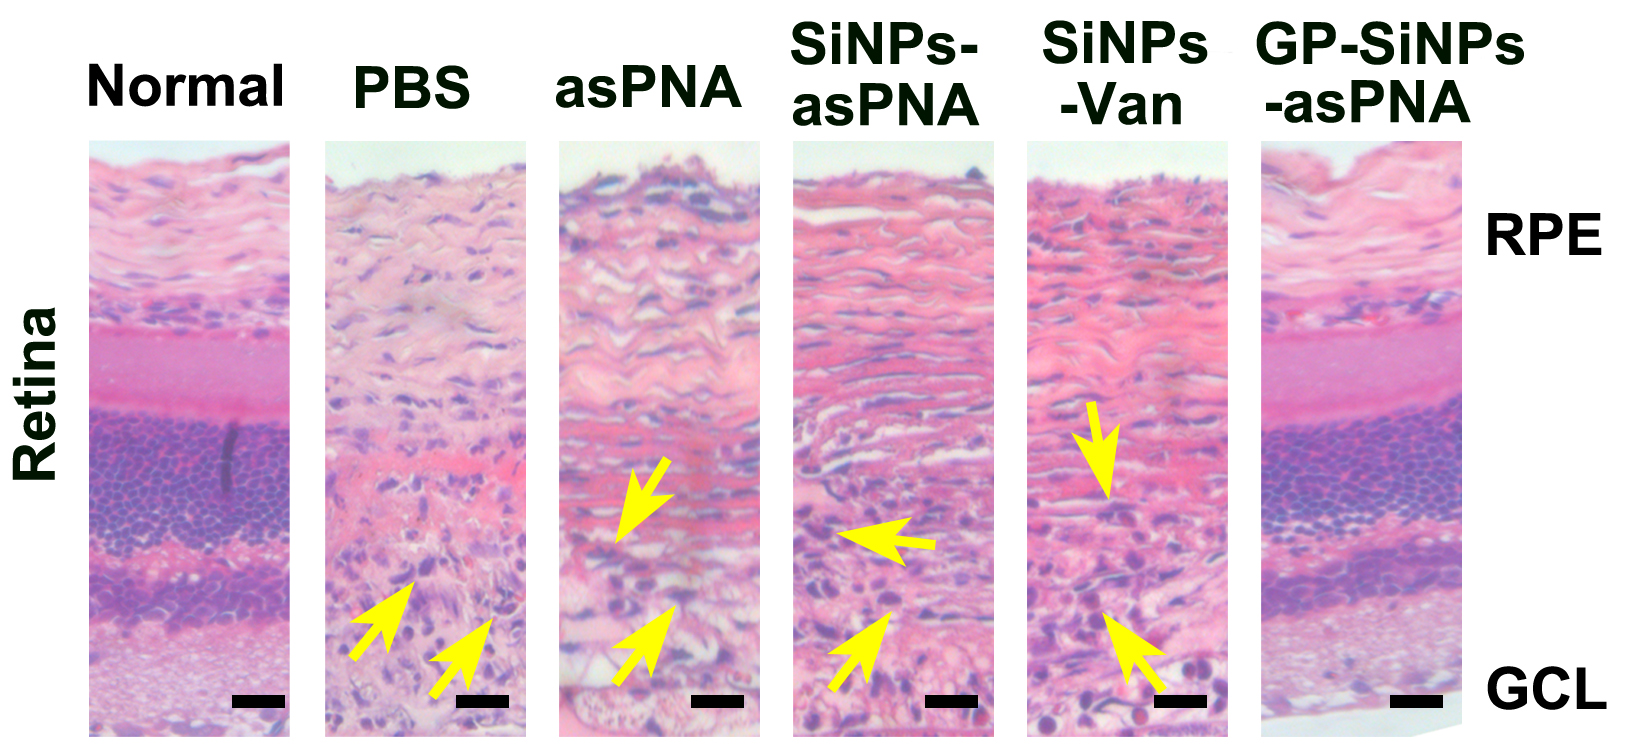
**

**Supplementary Fig. 20** H&E staining images of retina of(*E. coli* + *S. aureus*)-induced endophthalmitis mice with different treatments for 5 days. The yellow arrows in H&E staining indicate granulocyte infiltration. Scale bars: 25 μm.


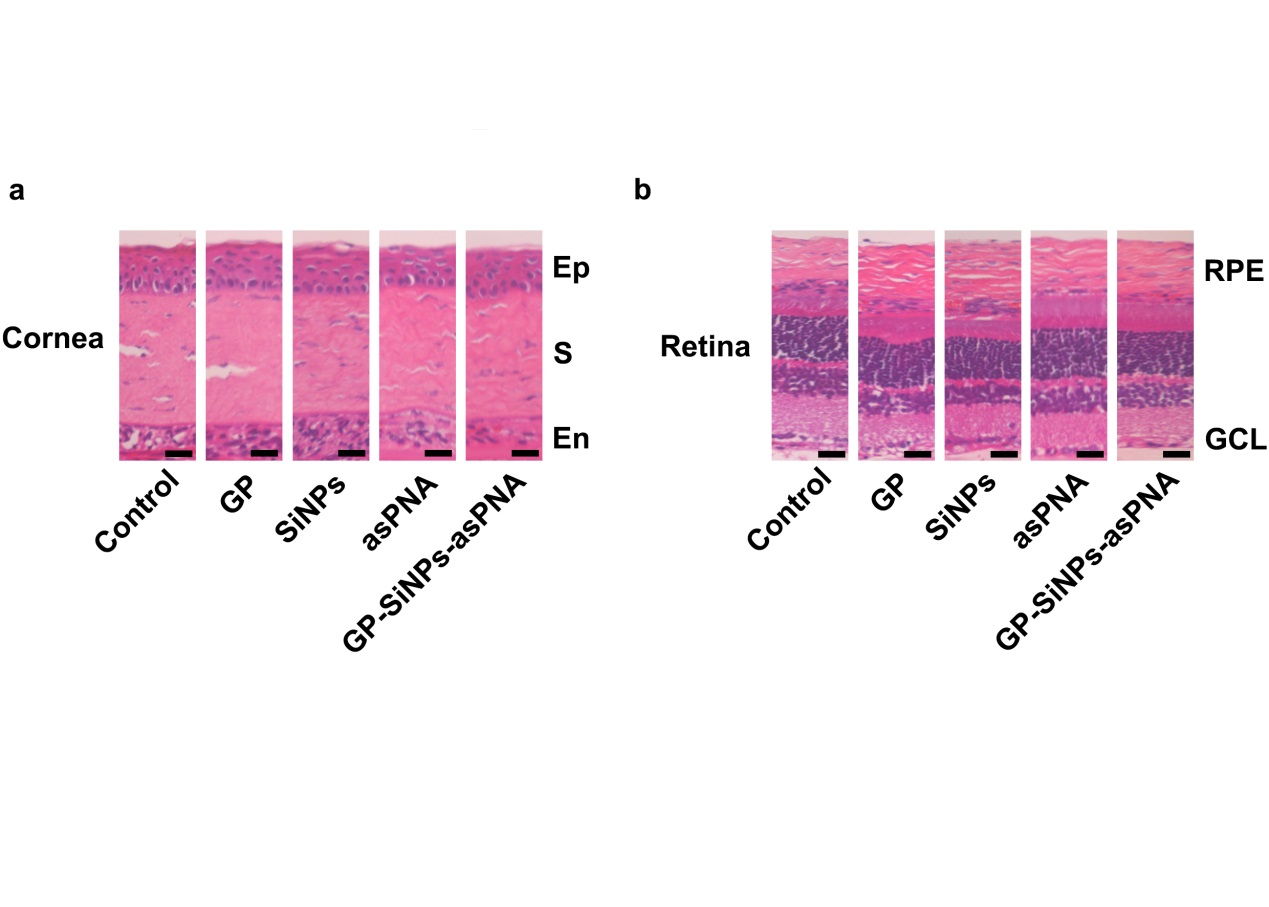


**Supplementary Fig. 21 a,** H&E staining images of corneal tissues of healthy mice treated with GP (5 mg mL-1), SiNPs (10 mg mL-1), asPNA (1 μM) and GP-SiNPs-asPNA (1 μM) for 24 h, respectively. Ep, epithelium; S, stroma; En, endothelium. **b,** H&E staining images of retina tissues of healthy mice treated with GP (5 mg mL-1), SiNPs (10 mg mL-1), asPNA (1 μM) and GP-SiNPs-asPNA (1 μM) for 24 h, respectively. RPE, retinal pigment epithelium；GCL, ganglion cell layer. Scale bar: 25 μm.
